# Supplementary material for: Tissue recovery practices and bioburden: a systematic review
Source: PubMed Central journal article supplement (PMC5116036; doi:10.1007/s10561-016-9590-5), 2016-10-19
Supplement: 10561_2016_9590_MOESM2_ESM.pdf [file 10561_2016_9590_MOESM2_ESM.pdf]

## APPENDIX B: ANALYTICAL FRAMEWORK

### Tissue Recovery Time Limits

1. Does ischemic time correlate to bioburden load?
  - a. What's the maximum ischemic time from asystole to *Skin Prep* that will result in grafts with the minimum bioburden load? **Ischemic time** is defined as the time between the cessation of heart beat and the recovery of the tissue. **Skin Prep** is defined as the application of antiseptic solution to decontaminate the skin.
2. Does *body cooling* or lack thereof correlate to bioburden load? **Body cooling** is defined as the placement of a donor body in conditions of cold environment.
3. Does the length of the recovery procedure correlate to bioburden load?
  - a. What recovery time range is optimal for controlling bioburden load? **Optimal** is defined as the lowest bioburden load found on recovered tissues.

### Donor Preparation and Recovery

4. Do any of these variables correlate to bioburden load?
  - a. Donor skin condition ie. cuts or abrasions
  - b. Presence of medical interventions
  - c. Cleanliness of skin
  - d. Trauma
  - e. Compound Fractures
  - f. Too many variables
5. Do skin preparation parameters correlate to bioburden load?
  - a. What skin preparation procedures are optimal for controlling bioburden load? **Optimal** is defined as the lowest bioburden load found on recovered tissues. Parameters may include:
    - i. Cleaning products
    - ii. Cleaning methods
    - iii. Shaving
    - iv. Disinfection products
    - v. Disinfection methods
6. Do physical barriers reduce the risk of tissue contamination?
  - a. What are the most effective physical barriers to reduce bioburden transfer to tissues? Variables to compare:
    - i. Staff barrier attire
    - ii. Double gloving vrs single gloving
    - iii. Cut-resistant gloves vrs. Regular gloves
    - iv. Donor draping techniques

- v. Liquid disinfectants versus treated adhesives such as commercially marketed Optsite™ or Steri-Drape™?
7. Is the order of steps in which a donor is prepped for recovery impact bioburden load?
    - a. What is the optimal order of steps in which a donor must be prepped for tissue recovery that produces the least amount of bioburden load to tissues? *Ex. If drapes won't stick after skin prep application is it equally effective to prepare skin after draping?*
  8. Do tissue excision techniques impact bioburden load of recovered tissues?
    - a. What excision techniques are most effective in reducing opportunities for bioburden contamination for: skin, heart, bone and soft tissue? Variables to compare:
      - i. Zone recovery
      - ii. Sequencing
      - iii. Instrument handling
      - iv. Incision site selection
      - v. Incision site preparation
      - vi. Glove changes between tissues
  9. Does post excision tissue handling impact bioburden load?
    - a. What are the most effective post excision handling practices that minimize bioburden load? *Handling practices are defined as those from excision of the tissue to storage and transport to the bank.* Variables to compare:
      - i. Tissue disinfection treatment prior to packaging
      - ii. Packaging materials used
  10. Does recovery of tissue after an autopsy or after organ donation affect the bioburden load on recovered tissue?

### **Tissue Storage and Transport**

11. Does the temporary storage conditions impact bioburden load?
  - a. What temporary storage method is most effective in controlling bioburden load for each tissue type during transportation? Variables to compare for impact on bioburden:
    - i. Storage medium for each tissue (skin, bone, cardiac)
    - ii. Optimal temperature for medium
    - iii. Optimal storage temperatures for each tissue
    - iv. Length of storage time
    - v. Temporary packaging
    - vi. Shipping container
    - vii. Packing configuration

### **Suitability of Recovery Personnel**

12. Can personal hygiene or cleanliness (shower clean?) affect tissue bioburden?
13. Can an acute illness such as exhibiting flu-like symptoms (upper respiratory, lower GI, a fever that causes sweating, or that can affect clear thinking) affect tissue bioburden?
14. Can presence of open lesions (from recovery personnel) affect tissue bioburden?
