# Supplementary material for: Tissue recovery practices and bioburden: a systematic review
Source: PubMed Central journal article supplement (PMC5116036; doi:10.1007/s10561-016-9590-5), 2016-10-19
Supplement: 10561_2016_9590_MOESM3_ESM.pdf [file 10561_2016_9590_MOESM3_ESM.pdf]

## APPENDIX C: EXCLUDED STUDIES

| Excluded Articles | Reason                                                                                              |
|-------------------|-----------------------------------------------------------------------------------------------------|
| Narhi, 2013       | Questionnaire results from multiple tissue banks regarding types of pathogens tested and stem cells |
| Ohkawara, 2012    | Does not report any tissue or bioburden outcomes.                                                   |
| Saegman, 2008     | Laboratory study on microbial inhibition. No tissue studied.                                        |
| Vangsnæs, 2006    | Review article                                                                                      |
| Holder, 1999      | Analysis of tissue culture medium and antimicrobial solutions. No tissues studied.                  |
| Tuppin, 1997      | Census                                                                                              |
| Myers, 1996       | Commentary                                                                                          |
| Mellonig, 1995    | Study of dental tissue                                                                              |
| Marx, 1993        | Review article                                                                                      |

### Excluded references

Holder, I. A., Robb, E., & Kagan, R. (1999). Antimicrobial mixtures used to store harvested skin: antimicrobial activities tested at refrigerator (4°C) temperatures. *Journal of burn care & research*, 20(6), 501-504.

Marx, R. E., & Carlson, E. R. (1993). Tissue banking safety: caveats and precautions for the oral and maxillofacial surgeon. *Journal of oral and maxillofacial surgery*, 51(12), 1372-1379.

Mellonig, J. T. (1995). Donor selection, testing, and inactivation of the HIV virus in freeze-dried bone allografts. *Practical Periodontics & Aesthetic Dentistry*, 7(6), 13-22; quiz 23.

Myers, S. R., Machesney, M. R., Warwick, R. M., & Cussons, P. D. (1996). Skin storage. *British medical journal*, 313(7055), 439.

Närhi, M., Natri, O., Desbois, I., Kinggaard Holm, D., Galea, G., Aranko, K., ... & Nordstrom, K. (2013). Collection, processing and testing of bone, corneas, umbilical cord blood and haematopoietic stem cells by European Blood Alliance members. *Vox sanguinis*, 105(4), 346-354.

Ohkawara, H., Kitagawa, T., Fukushima, N., Ito, T., Sawa, Y., & Yoshimine, T. (2012). A Newly Developed Container for Safe, Easy, and Cost-effective Overnight Transportation

of Tissues and Organs by Electrically Keeping Tissue or Organ Temperature at 3 to 6° C. *Transplantation proceedings*, 44(4), 855-858.

Saegeman, V. S., Ectors, N. L., Lismont, D., Verduyck, B., & Verhaegen, J. (2008). Short-and long-term bacterial inhibiting effect of high concentrations of glycerol used in the preservation of skin allografts. *Burns*, 34(2), 205-211.

Tuppin, P., Auvert, B., Loty, B., Paulmier, F., & Golmard, J. L. (1997, March). National census of tissue procurement, preservation, and transplantation in France. *Transplantation proceedings*, 29(1), 981-982.

Vangsness, C. T., Wagner, P. P., Moore, T. M., & Roberts, M. R. (2006). Overview of safety issues concerning the preparation and processing of soft-tissue allografts. *Arthroscopy: The Journal of arthroscopic & related surgery*, 22(12), 1351-1358.
