# Supplementary material for: Tissue recovery practices and bioburden: a systematic review
Source: PubMed Central journal article supplement (PMC5116036; doi:10.1007/s10561-016-9590-5), 2016-10-19
Supplement: 10561_2016_9590_MOESM4_ESM.pdf [file 10561_2016_9590_MOESM4_ESM.pdf]

### Appendix D: Microbial Sampling Procedures

| First Author, Year        | Organisms Tested       | Sample Preparations                                                                                                  | Microbial Testing Method (Culturing, Serological, Nucleic Acid ID <sup>1</sup> ) | Media type                                                                                                                            | Incubation Conditions                     |
|---------------------------|------------------------|----------------------------------------------------------------------------------------------------------------------|----------------------------------------------------------------------------------|---------------------------------------------------------------------------------------------------------------------------------------|-------------------------------------------|
| <b>Laboratory Studies</b> |                        |                                                                                                                      |                                                                                  |                                                                                                                                       |                                           |
| Gaucher, 2012             | NR                     | NR                                                                                                                   | NR                                                                               | NR                                                                                                                                    | NR                                        |
| Ohkawara, 2012            | NR                     | NR                                                                                                                   | NR                                                                               | NR                                                                                                                                    | NR                                        |
| Jashari, 2007             | Bacteria, fungi        | Tissue fragments, membrane (transport solution flushed through), decontamination solution, cryopreservation solution | Culturing                                                                        | Thioglycolate (with resazurine) or Sabouraud medium, Subcultures for aerobes/anaerobes, trypto-casein & soy medium for fungi & yeasts | 37°C for 14 days<br>20°C-25°C for 14 days |
| Castagnoli, 2003          | NR                     | NR                                                                                                                   | NR                                                                               | NR                                                                                                                                    | NR                                        |
| Bravo, 2000               | NR                     | NR                                                                                                                   | NR                                                                               | NR                                                                                                                                    | NR                                        |
| Wester, 1998              | NR                     | NR                                                                                                                   | NR                                                                               | NR                                                                                                                                    | NR                                        |
| Armiger, 1995             | NR                     | NR                                                                                                                   | NR                                                                               | NR                                                                                                                                    | NR                                        |
| Niwaya, 1995              | NR                     | NR                                                                                                                   | NR                                                                               | NR                                                                                                                                    | NR                                        |
| <b>Clinical Studies</b>   |                        |                                                                                                                      |                                                                                  |                                                                                                                                       |                                           |
| Heng, 2013                | Bacteria, Fungi, Virus | NR                                                                                                                   | NR                                                                               | NR                                                                                                                                    | NR                                        |
| Schubert, 2012            | Bacteria               | Tissue Swab                                                                                                          | Culturing                                                                        | Thioglycollate broth, blood agar and chocolate agar                                                                                   | 7 days                                    |
| Gocke, 2005               | Bacteria, fungi, Virus | Blood & tissues                                                                                                      | Culturing                                                                        | NR                                                                                                                                    | NR                                        |

|                   |                          |                                                                              |                                                                                                                       |                                                                                                                                                 |                          |
|-------------------|--------------------------|------------------------------------------------------------------------------|-----------------------------------------------------------------------------------------------------------------------|-------------------------------------------------------------------------------------------------------------------------------------------------|--------------------------|
|                   |                          |                                                                              | Serology for HIV-1 and -2 (Ab), HIV-1 (PCR), hepatitis B virus, hepatitis C virus, human T-lymphocyte virus, syphilis |                                                                                                                                                 |                          |
| Goffin, 2000      | Bacteria, Fungi, Virus   | "Various tissue samples and working solutions"                               | NR                                                                                                                    | NR                                                                                                                                              | NR                       |
| Sommerville, 2000 | Bacteria, Fungi, Virus   | Swab of femoral head, acetabular head, Tissue samples (bone biopsy, capsule) | Culturing                                                                                                             | Cultured on blood and chocolate agar, and Brewers Liquid culture medium                                                                         | 7 days                   |
|                   |                          |                                                                              | Serology                                                                                                              |                                                                                                                                                 |                          |
| Journeaux, 1999   | Bacteria                 | Swab of bone, bone piece, joint swab, capsule segment                        | Culturing                                                                                                             | Fragments macerated and culture in thioglycollate broth, swabs cultures on chocolate & horse agar & thioglycollate broth                        | 7 days                   |
| Verghese, 1999    | Bacteria, fungi, viruses | Tissue rinse (multiple) and tissue samples                                   | Culturing                                                                                                             | Rinse or samples cultured in thioglycollate broth & RCM, or nutrient broth, or SBD, or SBD with 80µg/ml gentamycin and 200µg/ml chloramphenicol | 37°C or room temperature |
|                   |                          |                                                                              | Serology for HIV, hepatitis B, hepatitis C, syphilis                                                                  |                                                                                                                                                 |                          |

|                |                          |                                                              |                                                                                                                     |                                                                                            |                                                 |
|----------------|--------------------------|--------------------------------------------------------------|---------------------------------------------------------------------------------------------------------------------|--------------------------------------------------------------------------------------------|-------------------------------------------------|
| Bettin, 1998   | Bacteria, fungi          | Samples from bone and soft tissue                            | Culturing                                                                                                           | Dextrose and Schaedler broths. Kimmig, blood agar, chocolate and endo agar plates used.    | 10 days                                         |
| Goffin, 1996   | Bacteria, fungi, viruses | NR                                                           | Serology for HIV-1 and -2 (Ab), HIV-1 (PCR), human T-lymphocyte virus1, hepatitis B, hepatitis C, syphilis, Q fever | NR                                                                                         | NR                                              |
| Campbell, 1995 | Bacteria, virus          | Swab of cut bone, synovial fluid                             | Culturing                                                                                                           | Stuart's transport medium, blood agar, culture broth                                       | 7 days                                          |
|                |                          |                                                              | Serology for HIV-1/2, hepatitis B/C, syphilis                                                                       |                                                                                            |                                                 |
| Gall, 1995     | Bacteria, fungi          | Pericardial swab, tissue, rinse/incubation/freezing solution | Culturing                                                                                                           | Blood agar, SDB slopes for swabs. Thioglycolate broth & nutrient broth for tissue samples. | 35°C for 48 hours. SBD slopes: 30°C for 21 days |
| Chapman, 1992  | Bacteria                 | NR                                                           | Culturing                                                                                                           | Broth, subculture on blood agar                                                            | 24 h for each culture                           |

<sup>1</sup>Serological analysis includes antibody and antigen using ELISAs or other methods. Nucleic acid Identification can be for RNA or DNA. NR: Not reported
