# Supplementary material for: Tissue recovery practices and bioburden: a systematic review
Source: PubMed Central journal article supplement (PMC5116036; doi:10.1007/s10561-016-9590-5), 2016-10-19
Supplement: 10561_2016_9590_MOESM5_ESM.pdf [file 10561_2016_9590_MOESM5_ESM.pdf]

### Appendix E1: Recovery Parameters affecting Bioburden in Laboratory Studies

| First Author, Year | Warm Ischemic time                   | Bioburden reduction methods | Barriers to Bioburden Transmission | Recovery Personnel Precautions | Pre-Recovery skin sanitation | Tissue Recovery Methods | Bioburden following recovery                                                                                 | Isolated Microorganisms                                                                                                                                                                                                                       |
|--------------------|--------------------------------------|-----------------------------|------------------------------------|--------------------------------|------------------------------|-------------------------|--------------------------------------------------------------------------------------------------------------|-----------------------------------------------------------------------------------------------------------------------------------------------------------------------------------------------------------------------------------------------|
| Jashari, 2007      | <6 h warm ischemic time              | Equipment sterilized        | NR                                 | NR                             | NR                           | NR                      | 23.75% (19/80) (first step)<br>25.54% (47/184) (modified antibiotic)<br>30.77% (56/182) (classic antibiotic) | <i>Staphylococci</i> ,<br><i>Citrobacter</i> ,<br><i>Escherichia coli</i> ,<br><i>Pseudomonas</i> ,<br><i>Streptococci</i> ,<br><i>Klebsiella</i> ,<br><i>Propionibacter</i><br><i>Bacillus</i> ,<br><i>Moraxella</i> ,<br><i>Enterococci</i> |
| Armiger, 1995      | <46.5 h between asystole to recovery | NR                          | NR                                 | NR                             | NR                           | NR                      | NR                                                                                                           | NR                                                                                                                                                                                                                                            |
| Niwaya, 1995       | <8.7h (average 3.75 h)               | NR                          | NR                                 | NR                             | NR                           | NR                      | NR                                                                                                           | NR                                                                                                                                                                                                                                            |

| First Author, Year | Warm Ischemic time                              | Bioburden reduction methods | Barriers to Bioburden Transmission | Recovery Personnel Precautions | Pre-Recovery skin sanitation                                  | Tissue Recovery Methods | Bioburden following recovery | Isolated Microorganisms |
|--------------------|-------------------------------------------------|-----------------------------|------------------------------------|--------------------------------|---------------------------------------------------------------|-------------------------|------------------------------|-------------------------|
| Gaucher, 2012      | NR                                              | NR                          | NR                                 | NR                             | NR                                                            | Electric dermatome      | NR                           | NR                      |
| Castagnoli, 2003   | NR                                              | NR                          | NR                                 | NR                             | NR                                                            | NR                      | NR                           | NR                      |
| Bravo, 2000        | <15h (warm)<br><br><24 h (if cooled within 12h) | NR                          | NR                                 | NR                             | Standard surgical preparation, standard skin graft procedures | Dermatome               | NR                           | NR                      |
| Wester, 1998       | NR                                              | NR                          | NR                                 | NR                             | NR                                                            | Dermatome               | NR                           | NR                      |

NR: Not reported.

Warm ischemic time: Time period between asystole and skin preparation while warm (room temperature).

## Appendix E2: Recovery Parameters Affecting Bioburden for Clinical Studies

| First Author, Year | Warm Ischemic time                              | Bioburden reduction methods                   | Barriers to Bioburden Transmission                                         | Recovery Personnel Precautions | Pre-Recovery Skin Sanitation               | Tissue Recovery Methods   | Bioburden following recovery           | Isolated Microorganisms                                                                                                                                                                                                                                                                                                                                          |
|--------------------|-------------------------------------------------|-----------------------------------------------|----------------------------------------------------------------------------|--------------------------------|--------------------------------------------|---------------------------|----------------------------------------|------------------------------------------------------------------------------------------------------------------------------------------------------------------------------------------------------------------------------------------------------------------------------------------------------------------------------------------------------------------|
| Heng, 2013         | <15h (warm)<br><br><24 h (if cooled within 12h) | Recovery site exclusive for tissue harvesting | Care not to enter the donor's trachea or abdominal cavity during excisions | NR                             | NR                                         | Heart valve block excised | 13.9% (5/36) (penicillin/streptomycin) | <i>Propionibacterium acnes</i> ,<br><i>Pseudomonas</i> ,<br><i>Staphylococcus</i> ,<br><i>Escherichia coli</i> ,<br><i>Acinetobacter</i> ,<br><i>Micrococcus</i> ,<br><i>Staphylococcus aureus</i> , <i>MRSA</i> ,<br><i>Rhodococcus</i> ,<br><i>Alpha haemolytic streptococcus</i> ,<br><i>bacillus</i> , <i>Candida albicans</i> , <i>Candida parapsilosis</i> |
|                    |                                                 |                                               |                                                                            |                                |                                            |                           | 42.9% (9/21) (amikacin/vancomycin)     |                                                                                                                                                                                                                                                                                                                                                                  |
| Goffin, 2000       | <6h warm ischemic time                          | NR                                            | NR                                                                         | NR                             | "sterile conditions" or "clean conditions" | NR                        | 25.4% (441/1739)                       | NR                                                                                                                                                                                                                                                                                                                                                               |
|                    |                                                 |                                               |                                                                            |                                |                                            |                           | 353/441 Multi-organ or                 |                                                                                                                                                                                                                                                                                                                                                                  |

| First Author, Year | Warm Ischemic time | Bioburden reduction methods                       | Barriers to Bioburden Transmission | Recovery Personnel Precautions | Pre-Recovery Skin Sanitation | Tissue Recovery Methods | Bioburden following recovery | Isolated Microorganisms                                                                                                                                                                                                      |
|--------------------|--------------------|---------------------------------------------------|------------------------------------|--------------------------------|------------------------------|-------------------------|------------------------------|------------------------------------------------------------------------------------------------------------------------------------------------------------------------------------------------------------------------------|
|                    |                    |                                                   |                                    |                                |                              |                         | transplant                   |                                                                                                                                                                                                                              |
|                    |                    |                                                   |                                    |                                |                              |                         | 86/441 cadavers              |                                                                                                                                                                                                                              |
| Verghese, 1999     | <24h               | Sterile instruments used from pericardium onwards | Sterile gowns, gloves              | NR                             | NR                           | NR                      | NR                           | Gram negative:<br><i>Klebsiella</i> ,<br><i>Enterobacter</i> , <i>E. coli</i> , <i>Citrobacter</i> ,<br><i>Proteus</i> ,<br><i>Pseudomonas</i> ,<br><i>Flavobacterium</i> ,<br><i>Acinetobacter</i> ,<br><i>Alkaliigenes</i> |
|                    |                    |                                                   |                                    |                                |                              |                         |                              | Gram positive:<br><i>Enterococcus</i> ,<br><i>diphtheroids</i> ,<br><i>Micrococci</i> ,<br><i>Staphylococcus</i> ,<br><i>Streptococci</i> ,<br><i>Clostridium</i> ,<br><i>Mycobacteria</i> ,                                 |

| First Author, Year | Warm Ischemic time | Bioburden reduction methods | Barriers to Bioburden Transmission | Recovery Personnel Precautions | Pre-Recovery Skin Sanitation | Tissue Recovery Methods | Bioburden following recovery | Isolated Microorganisms                                                                                                                                                                                                                                                                                                                                                                                                |
|--------------------|--------------------|-----------------------------|------------------------------------|--------------------------------|------------------------------|-------------------------|------------------------------|------------------------------------------------------------------------------------------------------------------------------------------------------------------------------------------------------------------------------------------------------------------------------------------------------------------------------------------------------------------------------------------------------------------------|
|                    |                    |                             |                                    |                                |                              |                         |                              | <i>Streptomyces</i><br>Fungi: <i>Candida krusei</i> , <i>Candida tropicalis</i> , <i>Candida parapsilosis</i> , <i>Candidaguillemondii</i> , <i>Gotrichum</i> ,<br><i>Aspergillus sp</i> , <i>Aspergillus fumigatus</i> , <i>Aspergillus terreus</i><br><i>Aspergillus niger</i> , <i>Aspergillus flavus</i><br><i>Penicillium</i> , <i>Paecilomyces sp.</i> <i>Curvularia</i> , <i>Trichoderma</i> , <i>Exophiala</i> |
| Goffin,            | <6h warm           | NR                          | NR                                 | NR                             | NR                           | Cold sterile            | 15.9%                        | Gram positive                                                                                                                                                                                                                                                                                                                                                                                                          |

| First Author, Year | Warm Ischemic time                            | Bioburden reduction methods | Barriers to Bioburden Transmission | Recovery Personnel Precautions | Pre-Recovery Skin Sanitation      | Tissue Recovery Methods                                                                                             | Bioburden following recovery                                                    | Isolated Microorganisms                                                                                                                                                                 |
|--------------------|-----------------------------------------------|-----------------------------|------------------------------------|--------------------------------|-----------------------------------|---------------------------------------------------------------------------------------------------------------------|---------------------------------------------------------------------------------|-----------------------------------------------------------------------------------------------------------------------------------------------------------------------------------------|
| 1996               | ischemic time                                 |                             |                                    |                                |                                   | transport media, including saline, Ringer's solution, Eurocollins, Tissue Culture Medium<br><br>199 HEPES (TCM 199) | positive culture (155/974)                                                      | cocci & rods, Gram negative, anaerobic bacteria, yeast & fungi                                                                                                                          |
| Gall, 1995<br>     | <24h (average 15 h) from asystole to recovery | NR                          | NR                                 | Sterile draping                | TPCH Surgeons (short OR exposure) | Surgical standard skin sterilization                                                                                | 2% (1/47) heart transplant<br><br>14% (10/71) Multi-organ (without antibiotics) | <i>Staphylococcus epidermidis</i> ,<br><i>Candida albicans</i> ,<br><i>S. aureus</i> ,<br><i>Acinetobacter</i> ,<br><i>Diphtheroid</i> ,<br><i>viridans</i> .<br><i>Streptococcus</i> , |

| First Author, Year | Warm Ischemic time | Bioburden reduction methods | Barriers to Bioburden Transmission | Recovery Personnel Precautions           | Pre-Recovery Skin Sanitation | Tissue Recovery Methods | Bioburden following recovery                   | Isolated Microorganisms                                                                                                                                                                                                                                                                                                                        |
|--------------------|--------------------|-----------------------------|------------------------------------|------------------------------------------|------------------------------|-------------------------|------------------------------------------------|------------------------------------------------------------------------------------------------------------------------------------------------------------------------------------------------------------------------------------------------------------------------------------------------------------------------------------------------|
|                    |                    |                             |                                    |                                          |                              |                         | 9% (5/53)<br>Multi-organ<br>(with antibiotics) | hemolytic<br><i>Streptococcus</i> ,<br><i>pseudomonas</i> ,<br>Gram negative<br><i>Bacillus</i>                                                                                                                                                                                                                                                |
|                    |                    |                             |                                    |                                          |                              |                         | 54%<br>(184/345)<br>mortuary                   |                                                                                                                                                                                                                                                                                                                                                |
| Schubert, 2012     | <24 h (15 cases)   | NR                          | NR                                 | Team of 2-6 surgeons, varying experience | NR                           | NR                      | 4.7%<br>(116/2447 bone samples)                | Coagulase neg.<br><i>Staphylococcus</i> ,<br><i>Micrococcus</i> ,<br><i>Bacillus cereus</i> ,<br><i>Corynebacterium</i> ,<br><i>Penicilium</i> ,<br><i>Alcaligenes</i> ,<br><i>Lactobacillus</i> ,<br><i>Escherichia coli</i> ,<br><i>Acinetobacter</i> ,<br><i>Enterococcus</i> ,<br><i>Pseudomonas aeruginosa</i> ,<br><i>Pneumococcus</i> , |

| First Author, Year | Warm Ischemic time | Bioburden reduction methods | Barriers to Bioburden Transmission | Recovery Personnel Precautions                                                           | Pre-Recovery Skin Sanitation | Tissue Recovery Methods | Bioburden following recovery | Isolated Microorganisms                                                                                                                                                                               |
|--------------------|--------------------|-----------------------------|------------------------------------|------------------------------------------------------------------------------------------|------------------------------|-------------------------|------------------------------|-------------------------------------------------------------------------------------------------------------------------------------------------------------------------------------------------------|
|                    |                    |                             |                                    |                                                                                          |                              |                         |                              | <i>Neisseria</i> ,<br><i>Candida</i>                                                                                                                                                                  |
| Gocke, 2005        | NR                 | NR                          | NR                                 | Donor assessment done by specialty nurses, recovery done by trained surgical technicians | NR                           | NR                      | 45% positive serology        | HIV, Hepatitis B, Hepatitis C, syphilis, HTLV                                                                                                                                                         |
| Sommerville, 2000  | NR                 | Prophylactic antibiotic     | NR                                 | NR                                                                                       | Standard surgical procedures | NR                      | 22% (51/232)                 | <i>Staphylococcus epidermidis</i> ,<br><i>Staphylococcus Corynebacterium</i> ,<br><i>Propionibacterium</i> ,<br><i>Bacillus</i> ,<br>Diphtheroids,<br><i>Neisseria</i> , <i>Serratia marcescens</i> , |



| First Author, Year | Warm Ischemic time | Bioburden reduction methods | Barriers to Bioburden Transmission | Recovery Personnel Precautions | Pre-Recovery Skin Sanitation | Tissue Recovery Methods | Bioburden following recovery                                                                  | Isolated Microorganisms                                                                                                                      |
|--------------------|--------------------|-----------------------------|------------------------------------|--------------------------------|------------------------------|-------------------------|-----------------------------------------------------------------------------------------------|----------------------------------------------------------------------------------------------------------------------------------------------|
|                    |                    |                             |                                    |                                |                              |                         |                                                                                               | <i>Pseudomonas, Acinetobacter, Enterobacter, Aspergillus, Candida, Streptomyces</i>                                                          |
| Journeaux, 1999    | NR                 | NR                          | NR                                 | NR                             | NR                           | NR                      | %13 (30/232 Live)<br>24% of Multi-organ samples (65/272)<br>35% of cadaveric samples (53/151) | Coagulase negative <i>Staphylococcus, Viridans</i> and non-hemolytic <i>Streptococci, Enterobacteria, Corynebacterium, Propionibacterium</i> |

| First Author, Year | Warm Ischemic time                                                                      | Bioburden reduction methods                          | Barriers to Bioburden Transmission | Recovery Personnel Precautions | Pre-Recovery Skin Sanitation                                                    | Tissue Recovery Methods | Bioburden following recovery                                                                        | Isolated Microorganisms                                                                                                                                                                                                                                                                                                                                  |
|--------------------|-----------------------------------------------------------------------------------------|------------------------------------------------------|------------------------------------|--------------------------------|---------------------------------------------------------------------------------|-------------------------|-----------------------------------------------------------------------------------------------------|----------------------------------------------------------------------------------------------------------------------------------------------------------------------------------------------------------------------------------------------------------------------------------------------------------------------------------------------------------|
| Bettin, 1998       | <24 hours warm ischemic time<br><br>(Operating room average 2.5 h; Morgue average 11 h) | Two sets of instruments used separately on each side | Double gloves                      | NR                             | 10% povidone iodine for 15 min, standard shaving, scrubbing, wrapping procedure | Steridrapes             | 49% overall (211/431)<br><br>40% of Cadaveric samples (45/112)<br><br>51% of organ donors (164/319) | <i>Staphylococci</i> ,<br><i>Propionibacteria</i> ;<br><br><i>Corynebacteria</i> ;<br><br><i>Sarcina</i><br><i>Enterococcus</i> ,<br><br><i>E. coli</i> , <i>Candida</i> ,<br><i>Bacteroides</i> ,<br><i>Acinetobacter</i> ,<br><i>Pneumococcus</i> ,<br><i>Pseudomonas</i><br><br><i>Peptococcus</i><br><br>Coagulase-negative<br><i>Staphylococcus</i> |
| Campbell, 1995     | NR                                                                                      | Antibiotics during hip surgery                       | NR                                 | NR                             | NR                                                                              | NR                      | NR                                                                                                  | <i>Staphylococcus epidermidis</i> ,<br><i>Staphylococcus aureus</i> ,<br><i>Streptococci</i> ,                                                                                                                                                                                                                                                           |

| First Author, Year | Warm Ischemic time                                                      | Bioburden reduction methods                                                                                                   | Barriers to Bioburden Transmission | Recovery Personnel Precautions | Pre-Recovery Skin Sanitation                                         | Tissue Recovery Methods   | Bioburden following recovery             | Isolated Microorganisms                                                             |
|--------------------|-------------------------------------------------------------------------|-------------------------------------------------------------------------------------------------------------------------------|------------------------------------|--------------------------------|----------------------------------------------------------------------|---------------------------|------------------------------------------|-------------------------------------------------------------------------------------|
|                    |                                                                         |                                                                                                                               |                                    |                                |                                                                      |                           |                                          | anaerobic diphtheroids, Gram positive and negative <i>Bacillus</i>                  |
| Marx, 1993         | <24 h if body is refrigerated<br><br><12hrs if body is not refrigerated | Required: air filtration, stainless steel furniture, washable walls. Germicidal solution left on skin and sprayed on incision | NR                                 | NR                             | Standard surgical procedure, germicidal solution sprayed on incision | Draped in standard manner | NR                                       | NR                                                                                  |
| Chapman, 1992      | NR                                                                      | "Antibiotic cover"                                                                                                            | NR                                 | NR                             | NR                                                                   | NR                        | 22.8% (8/35)<br><br>18.5% (5/27) femoral | <i>Streptococcus</i> group F, <i>Haemophilus influenzae</i> , <i>Staphylococcus</i> |

| First Author, Year | Warm Ischemic time | Bioburden reduction methods | Barriers to Bioburden Transmission | Recovery Personnel Precautions | Pre-Recovery Skin Sanitation             | Tissue Recovery Methods | Bioburden following recovery                                                  | Isolated Microorganisms                                                                                                                                                                                                                                                 |
|--------------------|--------------------|-----------------------------|------------------------------------|--------------------------------|------------------------------------------|-------------------------|-------------------------------------------------------------------------------|-------------------------------------------------------------------------------------------------------------------------------------------------------------------------------------------------------------------------------------------------------------------------|
|                    |                    |                             |                                    |                                |                                          |                         | heads from living donors<br>37.5% (3/8) bone allografts from cadaveric donors | <i>aureus</i> , Gram positive diphtheroids, <i>Staphylococci epidermidis</i>                                                                                                                                                                                            |
| Schubert, 2012     | <24 h (15 cases)   | NR                          | NR                                 | NR                             | Team of 2-6 surgeons, varying experience | NR                      | 2.7% (90/3315 tendon grafts)                                                  | Coagulase neg. <i>Staphylococcus</i> , <i>Micrococcus</i> , <i>Bacillus cereus</i> , <i>Corynebacterium</i> , <i>Penicilium</i> , <i>Alcaligenes</i> , <i>Lactobacillus</i> , <i>Eschericcia coli</i> , <i>Acinetobacter</i> , <i>Enterococcus</i> , <i>Pseudomonas</i> |

| First Author, Year | Warm Ischemic time | Bioburden reduction methods | Barriers to Bioburden Transmission | Recovery Personnel Precautions                                                           | Pre-Recovery Skin Sanitation | Tissue Recovery Methods | Bioburden following recovery | Isolated Microorganisms                                                              |
|--------------------|--------------------|-----------------------------|------------------------------------|------------------------------------------------------------------------------------------|------------------------------|-------------------------|------------------------------|--------------------------------------------------------------------------------------|
|                    |                    |                             |                                    |                                                                                          |                              |                         |                              | <i>aeruginosa</i> ,<br><i>Pneumococcus</i> ,<br><i>Neisseria</i> ,<br><i>Candida</i> |
| Gocke, 2005        | NR                 | NR                          | NR                                 | Donor assessment done by specialty nurses, recovery done by trained surgical technicians | NR                           | NR                      | NR                           | HIV, Hepatitis B/C, syphilis, HTLV, bacteria/fungi NR                                |

NR: Not reported.

Warm ischemic time: Time period between asystole and cold rinse or transport solution
