# Supplementary material for: Tissue recovery practices and bioburden: a systematic review
Source: PubMed Central journal article supplement (PMC5116036; doi:10.1007/s10561-016-9590-5), 2016-10-19
Supplement: 10561_2016_9590_MOESM6_ESM.pdf [file 10561_2016_9590_MOESM6_ESM.pdf]

**Appendix F: Recovered Tissue Treatment and Final Outcomes for Laboratory Studies**

| <b>First Author, Year</b> | <b>Tissue Recovered</b>  | <b>Number of Samples Recovered</b> | <b>Temporary storage solution</b>                                      | <b>Long Term Storage Solution and Parameters</b>                                         | <b>Tissue Viability</b>                      | <b>Proportion of positive cultures or microbial load</b> |
|---------------------------|--------------------------|------------------------------------|------------------------------------------------------------------------|------------------------------------------------------------------------------------------|----------------------------------------------|----------------------------------------------------------|
| Jashari, 2007             | Heart, arteries          | 446                                | Isotonic solution (saline, Ringers, M199) on ice                       | Cryopreservation solution                                                                | Morphological examination                    | 9.78% (18/184)                                           |
|                           |                          |                                    |                                                                        |                                                                                          |                                              | 9.89% (18/182)                                           |
| Armiger, 1995             | Aortic, pulmonary valves | 94                                 | NR                                                                     | 10% DMSO in M199, <-135°C                                                                | Tissue culture, autoradiography              | NR                                                       |
| Niwaya, 1995              | Heart, pulmonary valves  | 12                                 | TC-199 culture medium with 10% fetal calf serum (FCS), 5% HEPES buffer | 10% DMSO in TC-199 culture medium with 10% fetal calf serum, 5% HEPES, -80°C for 30 days | Flow cytometry, fibroblast viability testing | NR                                                       |
| Gaucher, 2012             | Skin                     | 38                                 | Ringer Lactate with antibiotic solution                                | 10% DMSO, 0.7% human serum albumin                                                       | MTT assay, histology                         | NR                                                       |
|                           |                          |                                    | RPMI 1640 with                                                         | 15% Glycerol, 0.7%                                                                       |                                              |                                                          |

| First Author, Year | Tissue Recovered | Number of Samples Recovered | Temporary storage solution                         | Long Term Storage Solution and Parameters                                                                                                                   | Tissue Viability                                                                                                                                                                                                                                                                                              | Proportion of positive cultures or microbial load |
|--------------------|------------------|-----------------------------|----------------------------------------------------|-------------------------------------------------------------------------------------------------------------------------------------------------------------|---------------------------------------------------------------------------------------------------------------------------------------------------------------------------------------------------------------------------------------------------------------------------------------------------------------|---------------------------------------------------|
|                    |                  |                             | antibiotic solution                                | human albumin                                                                                                                                               |                                                                                                                                                                                                                                                                                                               |                                                   |
| Castagnoli, 2003   | Skin             | 350                         | RPMI 1640, 1% human serum albumin with antibiotics | <p>TM medium<br/>4 or 37°C, up to 1 month<br/>sterile containers</p> <p>10% DMSO, &lt;-135°C, 15-45 days. Polystyrene boxes in aluminum heat sink boxes</p> | <p>MTT assay</p> <p>25% decrease in viability after 12 to 30 h post-procurement (fresh).<br/>Decreased viability by 50% by 60 h post-procurement.<br/>Skin stored at 4°C showed slower decreases in viability compared to 37°C.<br/>Cryopreserved skin has comparable viability of fresh skin stored at 4</p> | NR                                                |

| First Author, Year | Tissue Recovered | Number of Samples Recovered | Temporary storage solution     | Long Term Storage Solution and Parameters          | Tissue Viability                                     | Proportion of positive cultures or microbial load |
|--------------------|------------------|-----------------------------|--------------------------------|----------------------------------------------------|------------------------------------------------------|---------------------------------------------------|
|                    |                  |                             |                                |                                                    | °C for 4 days.                                       |                                                   |
| Bravo, 2000        | Skin             | 46 (cadaveric)              | Saline Rinse                   | 10% DMSO (1.4M)                                    | Tetrazolium reduction assay, oxygen consumption rate | NR                                                |
|                    |                  | 14 (living)                 | Saline saturated sterile gauze | 10% glycerol (1.37M), -115°C to -196°C, 15-30 days |                                                      |                                                   |
| Wester, 1998       | Skin             | NR                          | MEM with BSS                   | MEM-BSS with gentamicin at 4°C < 13 days           | Anaerobic metabolism                                 | NR                                                |

| <b>First Author,<br/>Year</b> | <b>Tissue<br/>Recovered</b> | <b>Number of<br/>Samples<br/>Recovered</b> | <b>Temporary<br/>storage solution</b> | <b>Long Term Storage<br/>Solution and Parameters</b> | <b>Tissue Viability</b> | <b>Proportion of positive<br/>cultures or microbial<br/>load</b> |
|-------------------------------|-----------------------------|--------------------------------------------|---------------------------------------|------------------------------------------------------|-------------------------|------------------------------------------------------------------|
|                               |                             |                                            |                                       | MEM-BSS with gentamicin<br>-22°C for >24 h           |                         |                                                                  |

NR: Not reported
