# Supplementary material for: Tissue recovery practices and bioburden: a systematic review
Source: PubMed Central journal article supplement (PMC5116036; doi:10.1007/s10561-016-9590-5), 2016-10-19
Supplement: 10561_2016_9590_MOESM7_ESM.pdf [file 10561_2016_9590_MOESM7_ESM.pdf]

**Appendix G: Recovered Tissue Treatment and Final Outcomes for Clinical Studies**

| <b>First Author, Year</b> | <b>Tissue Recovered</b>                     | <b>Number of Samples Recovered</b> | <b>Temporary storage solution</b>                           | <b>Long Term Storage Solution and Parameters</b>                                | <b>Tissue Viability</b>                                                                                                                                                                      | <b>Proportion of Positive Cultures or Microbial Load Post-Processing</b> | <b>Shipping Solution and Parameters</b>             |
|---------------------------|---------------------------------------------|------------------------------------|-------------------------------------------------------------|---------------------------------------------------------------------------------|----------------------------------------------------------------------------------------------------------------------------------------------------------------------------------------------|--------------------------------------------------------------------------|-----------------------------------------------------|
| Heng, 2013                | Aortic, pulmonary mitral valves             | 57                                 | 1-10°C saline                                               | 10% DMSO in M199<br><br>-196°C for up to 5 years.<br><br>Double cryogenic bags. | Valves visually inspected, tested for leakage/regurgitation with saline (prior to disinfection). Atrial and ventricular myocardium, aorta and pulmonary artery examined histopathologically. | 11.1% (4/36)                                                             | Transported in charged dry shipper at<br><br>-135°C |
|                           |                                             |                                    |                                                             |                                                                                 |                                                                                                                                                                                              | 4.76% (1/21)                                                             |                                                     |
| Goffin, 2000              | Cardiac allografts (heart & arterial roots) | 1817 hearts, 12 semilunar valves   | cold-ice sterile medium (ringer, saline, eurocollins, M199) | 10% DMSO, -140°C to -190°C                                                      | Leaflet competence test                                                                                                                                                                      | 5.8% (100/1739)                                                          | 10% DMSO, dry shipper, -140°C to -190°C<br><br>*    |

| First Author, Year | Tissue Recovered                            | Number of Samples Recovered | Temporary storage solution                                  | Long Term Storage Solution and Parameters | Tissue Viability       | Proportion of Positive Cultures or Microbial Load Post-Processing | Shipping Solution and Parameters                                                                                                                                                   |
|--------------------|---------------------------------------------|-----------------------------|-------------------------------------------------------------|-------------------------------------------|------------------------|-------------------------------------------------------------------|------------------------------------------------------------------------------------------------------------------------------------------------------------------------------------|
|                    |                                             |                             |                                                             |                                           |                        |                                                                   |                                                                                                                                                                                    |
| Vergheese, 1999    | Heart (whole)                               | 302                         | HBSS (salt solution) with antibiotics, on ice               | 10% DMSO in M199, -120°C to -170°C        | NR                     | NR                                                                | Samples placed into sterile plastic bags and immersed in Hank's balanced salt solution with antibiotics. It is stored in an ice pack surrounded by sterile ice for transportation. |
| Goffin, 1996       | Cardiac allografts (heart & arterial roots) | 989                         | cold-ice sterile medium (Ringer, saline, Eurocollins, M199) | 10% DMSO in TCM 199, -150°C, double bag   | Leaflet leakage tested | 4.1% (43/974)                                                     | Dry shipper or air, 150°C or dry ice                                                                                                                                               |

| First Author, Year | Tissue Recovered                                | Number of Samples Recovered | Temporary storage solution                                                                      | Long Term Storage Solution and Parameters | Tissue Viability | Proportion of Positive Cultures or Microbial Load Post-Processing | Shipping Solution and Parameters                    |
|--------------------|-------------------------------------------------|-----------------------------|-------------------------------------------------------------------------------------------------|-------------------------------------------|------------------|-------------------------------------------------------------------|-----------------------------------------------------|
| Gall, 1995         | Cardiac valves (whole heart, heart valve block) | 680                         | M199 with penicillin/streptomycin (Cadaver/ multi organ)<br><br>No solution (Multi-organ/donor) | 10% DMSO in M199, -135°C                  | NR               | 0% ( 0/47) Heart transplant                                       | Wet ice (whole heart), or cold packs (valve blocks) |
|                    |                                                 |                             |                                                                                                 |                                           |                  | 21% (21/99) Multi-organ (no abx)                                  |                                                     |
|                    |                                                 |                             |                                                                                                 |                                           |                  | 2% (1/61) Multi-organ (with abx)                                  |                                                     |
|                    |                                                 |                             |                                                                                                 |                                           |                  | 3% (9/345) (mortuary)                                             |                                                     |
| Schubert, 2012     | Bone                                            | 2447                        | Sterile dry container at 4°C                                                                    | NR                                        | NR               | 18.8% (39/208; no antibiotics)                                    | NR                                                  |
|                    |                                                 |                             |                                                                                                 |                                           |                  | 8% (42/527; 0.1% thimerosal)                                      |                                                     |
|                    |                                                 |                             |                                                                                                 |                                           |                  | 4.6% (79/1712; 1.2g/l rifampicin)                                 |                                                     |
| Gocke, 2005        | Bone and tissue                                 | 297,644 samples<br>4488     | NR, shipped on ice overnight                                                                    | NR                                        | NR               | NR                                                                | On ice, overnight                                   |

| First Author, Year | Tissue Recovered                | Number of Samples Recovered | Temporary storage solution | Long Term Storage Solution and Parameters | Tissue Viability | Proportion of Positive Cultures or Microbial Load Post-Processing | Shipping Solution and Parameters |
|--------------------|---------------------------------|-----------------------------|----------------------------|-------------------------------------------|------------------|-------------------------------------------------------------------|----------------------------------|
|                    |                                 | donors                      |                            |                                           |                  |                                                                   |                                  |
| Sommerville, 2000  | Bone (femoral head)             | 232                         | None                       | NR                                        | Not Done         | NR                                                                | NR                               |
| Journeaux, 1999    | Bone (femur, tibia, hemipelvis) | 401                         | NR                         | NR                                        | NR               | NR                                                                | NR                               |
| Bettin, 1998       | Bone                            | 431                         | NR                         | NR                                        | NR               | NR                                                                | NR                               |
| Campbell, 1995     | Bone (femoral head/long bones)  | 2361                        | Wrapped in sterile bags    | -70°C                                     | Histopathology   | 1.1% (27/2361)                                                    | NR                               |
| Chapman, 1992      | Bone (femoral head/whole bones) | 35                          | NR                         | NR                                        | NR               | 0% (0/30) (5 discarded)                                           | NR                               |
| Schubert, 2012     | Tendon                          | 3315                        | Sterile dry container at   | NR                                        | NR               | 6.9% (7/101; no antiseptics)                                      | NR                               |

| First Author, Year | Tissue Recovered | Number of Samples Recovered | Temporary storage solution | Long Term Storage Solution and Parameters | Tissue Viability | Proportion of Positive Cultures or Microbial Load Post-Processing                                         | Shipping Solution and Parameters |
|--------------------|------------------|-----------------------------|----------------------------|-------------------------------------------|------------------|-----------------------------------------------------------------------------------------------------------|----------------------------------|
|                    |                  |                             | 4°C                        |                                           |                  | 10.4% (12/115;<br>90% alcohol)<br><br>4.6% of<br>(143/3099;<br>0.02%<br>chlorohexadine<br>in 70% alcohol) |                                  |
| Gocke, 2005        | Tendon, fascia   | NR                          | NR                         | NR                                        | NR               | NR                                                                                                        | NR                               |

NR: Not reported
